# Supplementary material for: Investigation on the dynamics of electron transport and recombination in TiO2 nanotube/nanoparticle composite electrodes for dye-sensitized solar cells
Source: Royal Society of Chemistry journal article supplement (doi:10.1039/c1cp21517e), 2011-01-01
Supplement: c1cp21517e.pdf [file c1cp21517e.pdf]

## Supporting Information

### Investigation on the Dynamics of Electron Transport and Recombination in TiO<sub>2</sub> Nanotube/Nanoparticle Composite Electrodes for Dye-sensitized Solar Cells

Raheleh Mohammadpour,<sup>a</sup> Azam Irajizad,<sup>\*a</sup> Anders Hagfeldt<sup>b</sup> and Gerrit Boschloo<sup>\*b</sup>

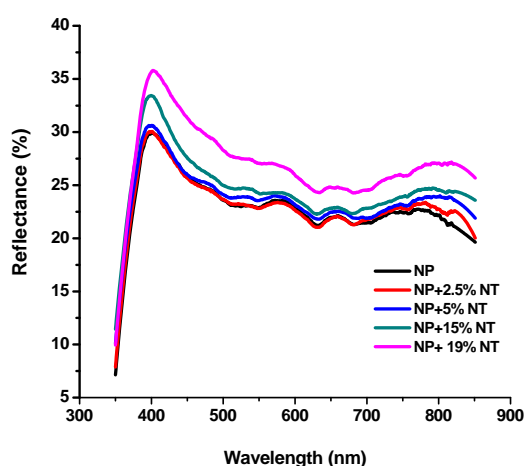

**Figure S1** Reflectance spectra of bare composite TiO<sub>2</sub> films on TEC8 glass electrodes in air. The spectrophotometer used was an Avaspec2048-TEC UV-Vis-NIR with integrating sphere Avalight-DHS, collecting total (diffuse + specular) reflectance.

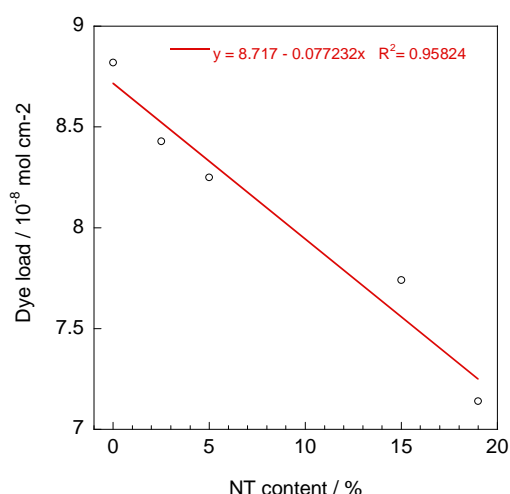

**Figure S2** Amount of adsorbed N719 dye on composite TiO<sub>2</sub> electrodes (thickness 10 μm), determined by dye desorption. The drawn line is a linear regression fit.

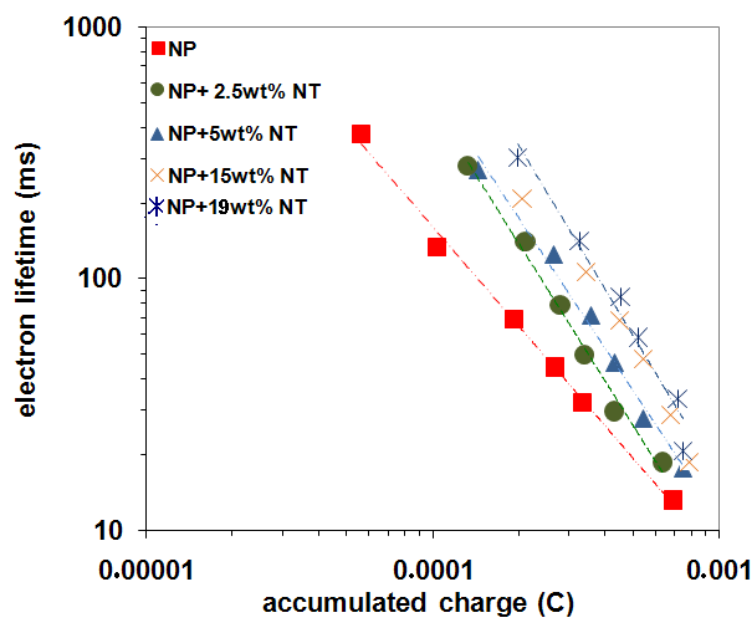

**Figure S3** Dependence of electron lifetime on accumulated charge density under open-circuit conditions. Increase in NT content leads to increased lifetime at a given charge, because of the high trap density in the TiO<sub>2</sub> nanotubes. Note that the  $V_{OC}$  decreases with increased NT content.

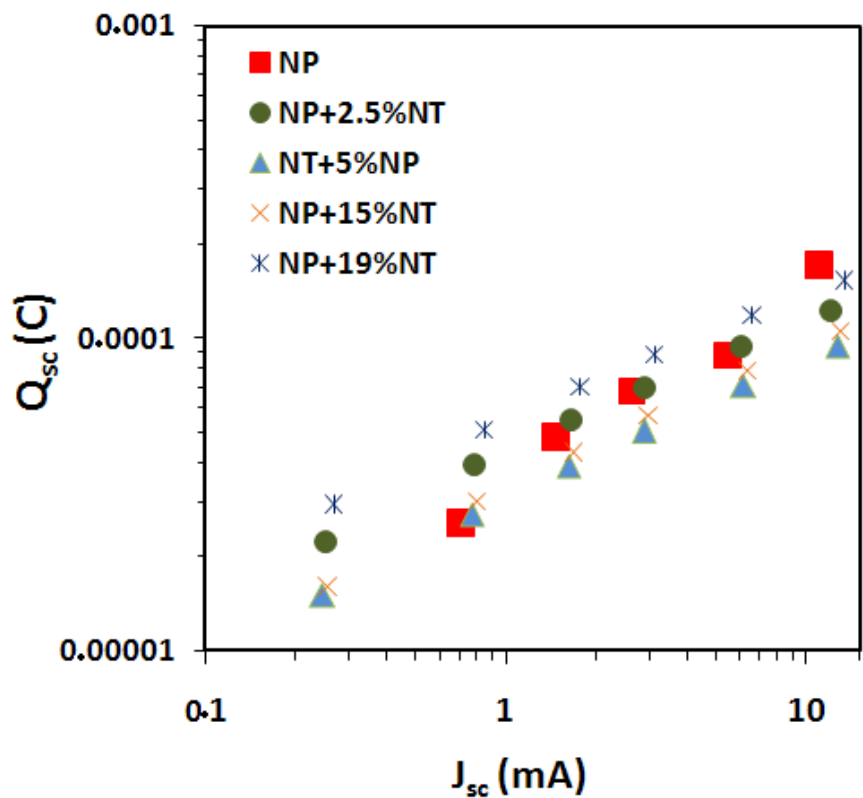

**Figure S4** Extracted charge at short circuit condition as function of short circuit current of the solar cell based on NT/NP composite electrodes.

**Table S1** Fitting parameters for the exponential trap distribution (Eq. 1, Fig. 3) in composite TiO<sub>2</sub> NT/NP electrodes.

| Composition     | $g_0$<br>(cm <sup>-3</sup> eV <sup>-1</sup> ) | $m_c$<br>(meV) |
|-----------------|-----------------------------------------------|----------------|
| NP              | 1×10 <sup>15</sup>                            | 87             |
| NP + 2.5 wt% NT | 2×10 <sup>15</sup>                            | 92             |
| NP + 5 wt% NT   | 3×10 <sup>15</sup>                            | 97             |
| NP + 15 wt% NT  | 5×10 <sup>15</sup>                            | 105            |
| NP + 19 wt% NT  | 1×10 <sup>16</sup>                            | 111            |
